# Supplementary material
Source: PubMed Central journal article supplement (PMC6964155)
Supplement: ONCO-25-e85-s001.pdf [file ONCO-25-e85-s001.pdf]

Supplemental Table for:  
Predicting Chemotherapy Toxicity and Death in Older Adults With Colon Cancer: Results of MOST Study  
Frederique Retornaz et al.

**Supplemental Table S1 : Ability of the stratified risk score to predict chemotherapy toxicity**

| Risk score  | No toxicity |    | Toxicity |    | P<br>< 0.0001 |
|-------------|-------------|----|----------|----|---------------|
|             | n           | %  | n        | %  |               |
| 0-3 (low)   | 30          | 77 | 9        | 23 |               |
| 4-8 (mid)   | 9           | 26 | 26       | 74 |               |
| 9-13 (high) | 3           | 18 | 14       | 82 |               |
